# Supplementary material for: Formula Milk Supplementation on the Postnatal Ward: A Cross-Sectional Analytical Study
Source: Nutrients. 2018 May 14;10(5):608. doi: 10.3390/nu10050608 (PMC5986488; doi:10.3390/nu10050608)
Supplement: Supplementary file 1 [file nutrients-10-00608-s001.pdf]

## Supplementary Materials

### Annual eBF rates at discharge 2016

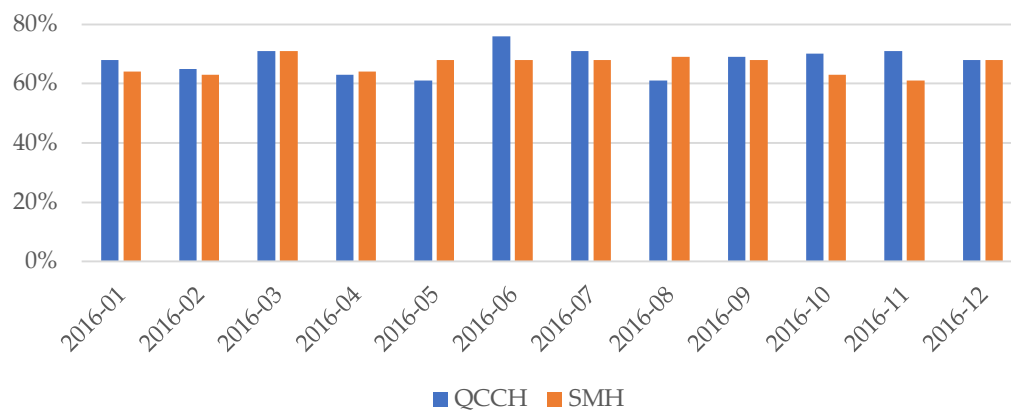

**Figure S1: Annual eBF rates at discharge on the postnatal wards at QCCH and SMH in 2016.** Percentages (%) are based on the feeding methods recorded at discharge of 4388 infants. Monthly eBF rates for QCCH and SMH are shown. The overall annual eBF rate was 67%. QCCH; Queen Charlotte's and Chelsea Hospital, SMH; Saint Mary's Hospital: eBF; exclusively breastfed. Clinical supplementation: 78 (58.7%) of non-clinical supplementation occurred between the hours of 22.00-06.00. Clinical reasons to supplement included infant hypoglycaemia and very low birth weight (<1500g). Most commonly recorded supplementation reason was maternal request.

### Barriers to supporting BF on postnatal ward

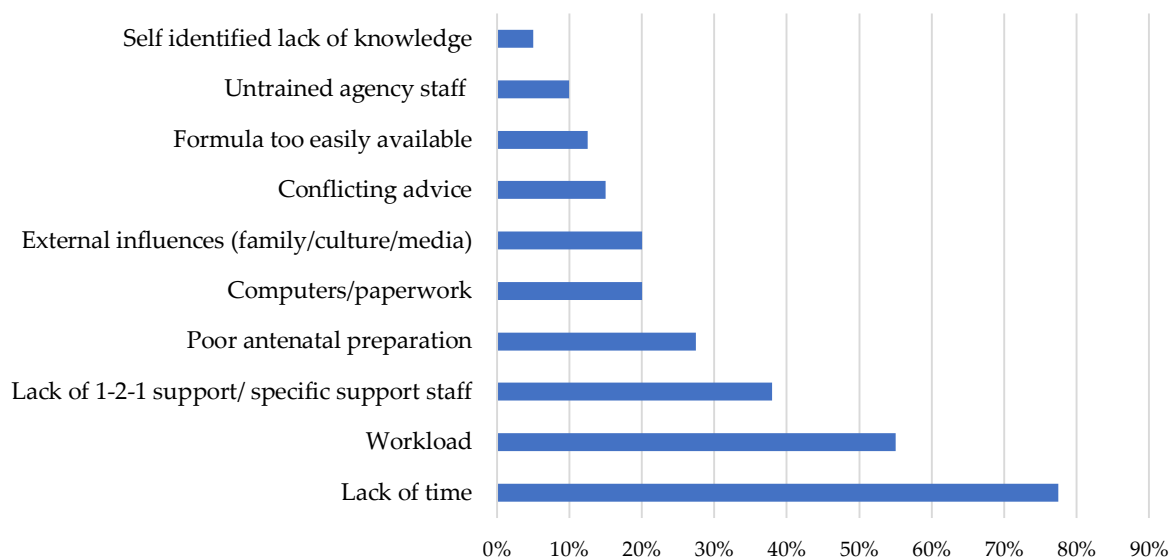

**Figure S2: Staff's perceived barriers to supporting breastfeeding on the wards.** Percentage (%) of total staff (n=31) expressing each theme is graphically represented.

Table S1: Midwife characteristics

| Midwife characteristics                              |                |
|------------------------------------------------------|----------------|
| Staff age                                            | 38 (28, 50)    |
| Years' experience as midwife                         | 7 (4, 18)      |
| Ward Type                                            |                |
| <i>Postnatal</i>                                     | 18 (58)        |
| <i>Birth Centre/Private ward</i>                     | 13 (42)        |
| Ethnicity: White Caucasian                           | 22 (71)        |
| Educated to degree level                             | 27 (87)        |
| NIFS-AMI                                             | 20 (65)        |
| Non-clinical supplementation rate (%)                | 0.6 (0.0, 2.8) |
| Attended training sponsored by a formula company     | 9 (29)         |
| Primiparous/multiparous                              | 14 (45)        |
| eBF own infants                                      | 8 (57)         |
| Longest BF duration (months)                         | 14 (5, 23)     |
| Earliest age child received non-breast milk (months) | 3 (1, 6)       |
| eBF as infant                                        | 17 (57)        |
| Duration of BF as infant (months)                    | 6 (4, 12)      |

All data are displayed; number (% or IQR) as shown. Ethnic groups represented in the non- Caucasian midwives were Black African 8 (25.8) and Asian 1 (3.2). 100% staff attended BF training course within the Imperial College London NHS Trust. BF-breastfeeding; eBF –exclusively breastfeeding; NIFS-AMI- neonatal infant-formula supplementation in the absence of medical indication.

Table S2: Midwife characteristics according to their supplementation categorisation (*n* = 31).

|                                                        | Supplementing<br>midwives<br><i>n</i> = 20 | Non-supplementing<br>midwives<br><i>n</i> = 11 | <i>p</i> =   |
|--------------------------------------------------------|--------------------------------------------|------------------------------------------------|--------------|
| <b>Descriptive characteristics</b>                     |                                            |                                                |              |
| <b>Staff age</b>                                       | 41 (28, 56)                                | 30 (28, 39)                                    | <b>0.044</b> |
| Years' experience as midwife                           | 8 (4, 23)                                  | 5 (4, 9)                                       | 0.212        |
| <b>Ward Type</b>                                       |                                            |                                                |              |
| <i>Postnatal</i>                                       | 15 (75)                                    | 3 (27)                                         | <b>0.02</b>  |
| <i>Birth Centre/ Private Ward</i>                      | 5 (25)                                     | 8 (73)                                         |              |
| Ethnicity: White Caucasian                             | 12 (60)                                    | 10 (91)                                        | 0.11         |
| Educated to degree level                               | 16 (80)                                    | 11 (100)                                       | 0.269        |
| <b>Personal experiences</b>                            |                                            |                                                |              |
| Positive attitudes to BF in social/cultural background | 16 (80)                                    | 8 (73)                                         | 0.676        |
| Primiparous/multiparous                                | 11 (55)                                    | 3 (27)                                         | 0.26         |
| eBF own infants                                        | 5 (46)                                     | 3 (100)                                        | 0.209        |
| Longest BF duration (months)                           | 12 (4, 16)                                 | 24 (16, 27)                                    | 0.29         |
| Earliest age child received non-breast milk (months)   | 2 (1, 5)                                   | 4 (3, 5)                                       | 0.456        |
| eBF as infant                                          | 10 (50)                                    | 7 (64)                                         | 0.708        |
| Duration of BF as infant (months)                      | 11 (5, 12)                                 | 6 (3, 6)                                       | 0.17         |
| <b>Staff perceptions and professional experiences</b>  |                                            |                                                |              |
| Perceived impact of BMS (1-10)                         | 7 (5, 9)                                   | 8 (7, 10)                                      | 0.183        |
| Time satisfaction for infant feeding support (1-10)    | 3 (1, 6)                                   | 6 (3, 9)                                       | 0.032        |
| Attended training sponsored by a formula company       | 6 (30)                                     | 2 (18)                                         | 0.429        |
| Received training on finger-feeding                    | 12 (60)                                    | 7 (64)                                         | 1            |

|                                                            |             |             |       |
|------------------------------------------------------------|-------------|-------------|-------|
| Satisfied with time available for finger-feeding           | 4 (20)      | 6 (55)      | 0.106 |
| Confidence in finger-feeding (1-10)                        | 7 (2, 10)   | 10 (8 10)   | 0.07  |
| Correctly identify three correct reasons for supplementing | 7 (35)      | 4 (36)      | 1     |
| Time allocation by percentage                              |             |             |       |
| <i>Computer/paperwork</i>                                  | 45 (24, 60) | 50 (30, 60) | 0.594 |
| <i>General patient care</i>                                | 25 (20, 33) | 30 (20, 40) | 0.729 |
| <i>Infant feeding support</i>                              | 12 (10, 20) | 10 (10, 20) | 0.945 |
| <i>Observations and medication</i>                         | 11 (10, 20) | 10 (5, 10)  | 0.077 |

Data is shown as median (percentage or interquartile range). Mann-Whitney U Test and Fisher's Exact Test (2-tailed) were used. BMS-breast milk supplements; BF-breastfeeding; eBF –exclusively breastfeeding; NIFS-AMI- neonatal infant-formula supplementation in the absence of medical indication.
